# Supplementary material for: The Role of Experienced and Anticipated Discrimination in the Lives of People With First-Episode Psychosis
Source: Atypon-hosted journal article supplement (doi:10.1176/appi.ps.201300291), 2014-05-01
Supplement: 1034_ds001.pdf [file 1034_ds001.pdf]

*The PICOS-VENETO Group*

**COORDINATING STAFF:** M. Tansella M. Ruggeri, A. Lasalvia, M. Bertani, C. Bonetto, P. Brambilla, S. Tosato, D. Cristofalo, G. Marrella, S. Bissoli, C. Perlini.

**COLLABORATING SITES:** **Bassano del Grappa:** P. Tito, M. Lunardon, F. Gava, E. Borso, L. Grandina, M. Paliotto, L. Roggia. **Thiene:** A. Danieli, C. Poloni, M.R. Altiero, F. Piazza. **Montebelluna M.:** E. Ceccato, C. Busana, A. Campi, A. Zanconato. **Vicenza 1 UO:** P. Zamorani, R. Binotto, A. Caneva, E. Lazzarin, G. Zordan. **Vicenza 2 UO:** C. Dolce, G.B. Fanchin, C. Negro. **Vicenza 3 UO:** F. Gardellin, M. Crestale, L. Paiola, A. Sale. **Pieve di Soligo:** I. Morandin, E. Biondi, A. Cordella G. Favaretto, S. Geatti, P. Urbani. **Treviso:** M. De Rossi, G. Zanatta, J. Spessotto, R. Penelope, L. Grando, M. Sgnaolin, C. Tozzini, G. Visentin, L. Schiavon. **Portogruaro:** B. Gentile, M.G. Bolacchi, L. Marzotto, F. Moni, L. Rossi. **San Donà di Piave:** I. Amalric, C. Miceli, M.R. De Zordo, L. Ramon, S. Russo. **Venezia:** R. Rossi, G. Casagrande, V. De Nardo, A. Facchetti, F. Ramaciotti. **Mirano:** V. Marangon, G. Coppola, A. Marcolin, P. Meneghini, F. Sbraccia, C. Segato. **Camposampiero:** R. Riolo, L. Cappellari, M. Cutugno, L. Meneghetti, L. Longhin, B. Paoleschi. **Cittadella:** D. Scalabrin, L. Antonello, A. Purgato, G. Santucci, C. Tosin, R. Volpato, R. Zurlo. **Padova 2 Serv.:** M. Zucchetto, M. Pedron, S. Pinton, M. Benetazzo. **Padova 3 Serv.:** C. Cremonese, L. Pavan, M. Semenzin, L. Sifari, F. Zorzi. **Rovigo:** M.M. Martucci, N. Magno, G. Meloni, E. Toniolo. **Adria:** M. Pavanati, E. Destro, L. Finotti. **Verona 1 Serv.:** R. Fiorio, A. Marsilio, N. Pedrocco, P. Pollola. **Verona 2 Serv.:** L. Lazzarotto, F. Nosè, P. Rossin, V. Vivenza. **Verona 3 Serv.:** A. Lasalvia, M. Bertani, S. Bissoli, K. De Santi, G. Marrella, R. Mazzoncini, M. Ruggeri. **Verona 4 Serv.:** A. Urbani, L. Bianchi, G. Carcereri, L. Lunardi, G. Migliorini, G. Perdonà, C. Piazza. **Legnago:** D. La Monaca, G. D'Agostini I. Boggian, G. Piccione, E. Saladini. **Domegliara:** F. Gomez, S. Frazzangaro. **Isola della Scala:** S. Nicolaou, L. Cordioli, G. Bertolazzi, V. Pagliuca. **Villa Santa Chiara:** M. Abate, M. Bortolomasi, M. Giacomuzzi, M. Segala. **Villa Santa Giuliana:** F. De Nardi, F. Basetto, C. Bernardis, A. Bezzetto, M. Santi.
